# Supplementary material for: Identification of Candidate Olfactory Genes in Scolytus schevyrewi Based on Transcriptomic Analysis
Source: Frontiers journal article supplement (doi:10.3389/fphys.2021.717698), 2021-10-04
Supplement: Image_1.pdf [file Image_1.pdf]

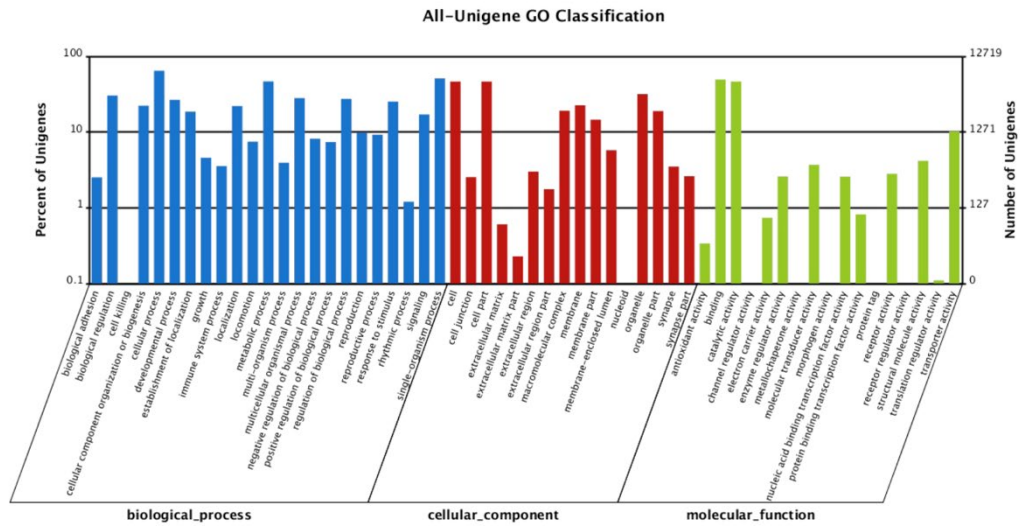

Figure S1 GO classification analysis of Unigenes in All-Unigene. GO functions is showed in X-axis. The right Y-axis shows the number of genes which have the GO function, and the left Y-axis shows the percentage.
